# Supplementary material for: An interactive tool to personalise 24-hour activity, sitting and sleep prescription for optimal health outcomes
Source: Research Square preprint supplement (doi:10.21203/rs.3.rs-6897341/v1), 2025-06-30
Supplement: Supplementary file 1 [file 7879b9514cd0c0f006c1ed6a.pdf]

## **SUPPLEMENTARY MATERIAL**

*An interactive tool to personalise 24-hour activity, sitting and sleep prescription for optimal health outcomes.* Maddison L Mellow<sup>1</sup>, Tyman E Stanford<sup>1</sup>, Timothy Olds<sup>1</sup>, Aaron Miatke<sup>1</sup>, & Ashleigh E Smith<sup>1†</sup>, Dorothea Dumuid<sup>1†\*</sup>.

## **CONTENTS**

**Supplementary File 1:** Summary of inclusion and exclusion criteria

**Supplementary File 2:** Summary of original and re-classified variables included in final analyses

**Supplementary File 3:** Lambda value derived from 10-fold cross-validation

**Supplementary File 4:** Workflow underpinning the R Shiny 'ideal day' app.

**Supplementary File 5:** Demographic characteristics across strata

**Supplementary File 6:** Feasible limits of time-use behaviours within strata

## Supplementary File 1

Summary of inclusion and exclusion criteria

| UK Biobank code and URL link          | Description of variable                                                   | Rules for inclusion                                                                                                                                                                   |
|---------------------------------------|---------------------------------------------------------------------------|---------------------------------------------------------------------------------------------------------------------------------------------------------------------------------------|
| f.864.0.0 ( <a href="#">864</a> )     |                                                                           | Response was <u>not</u> -2 ("unable to walk")                                                                                                                                         |
| f.864.1.0 ( <a href="#">864</a> )     | Number of days/week walked 10+ minutes                                    |                                                                                                                                                                                       |
| f.864.2.0 ( <a href="#">864</a> )     |                                                                           |                                                                                                                                                                                       |
| f.864.3.0 ( <a href="#">864</a> )     |                                                                           |                                                                                                                                                                                       |
| f.90015.0.0 ( <a href="#">90015</a> ) | Valid wear time (indicator of accelerometry data quality)                 | valid_wear=1 (yes)                                                                                                                                                                    |
| f.90002.0.0 ( <a href="#">90002</a> ) | Data problem indicator                                                    | Data_prob_ind=NA (no problems indicated)                                                                                                                                              |
| f.20242.0.0 ( <a href="#">20242</a> ) | Fluid intelligence completion status                                      | ≥4 cognitive tests completed                                                                                                                                                          |
| f.20244.0.0 ( <a href="#">20244</a> ) | Pairs matching completion status                                          |                                                                                                                                                                                       |
| f.20245.0.0 ( <a href="#">20245</a> ) | Symbol digit substitution completion status                               | *note: based on completion status variables=1 (yes), and date/time numeric memory test completed ≠ NA.                                                                                |
| f.20246.0.0 ( <a href="#">20246</a> ) | Trail making completion status                                            |                                                                                                                                                                                       |
| f.20138.0.0 ( <a href="#">20138</a> ) | When numeric memory test completed                                        |                                                                                                                                                                                       |
| f.53.0.0 ( <a href="#">53</a> )       | Date of attending assessment centre                                       | At least one date ≠ NA (i.e., participant has attended at least one assessment centre visit)                                                                                          |
| f.53.1.0 ( <a href="#">53</a> )       |                                                                           |                                                                                                                                                                                       |
| f.53.2.0 ( <a href="#">53</a> )       |                                                                           |                                                                                                                                                                                       |
| f.53.3.0 ( <a href="#">53</a> )       |                                                                           |                                                                                                                                                                                       |
| f.90010.0.0 ( <a href="#">90010</a> ) | Start time of accelerometer wear                                          |                                                                                                                                                                                       |
| ( <a href="#">130836</a> )            | Date F00 (dementia in Alzheimer's disease) first reported                 | Date of diagnosis occurred later than:<br>1. Date of attending assessment centre (53)<br>2. Start of accelerometer wear time (90010)<br>3. When numeric memory test completed (20138) |
| ( <a href="#">130838</a> )            | Date F01 (vascular dementia) first reported                               |                                                                                                                                                                                       |
| ( <a href="#">130840</a> )            | Date F02 (dementia in other diseases classified elsewhere) first reported |                                                                                                                                                                                       |

| UK Biobank code and URL link | Description of variable                                                                                                  | Rules for inclusion                                                                                                                                                                                           |
|------------------------------|--------------------------------------------------------------------------------------------------------------------------|---------------------------------------------------------------------------------------------------------------------------------------------------------------------------------------------------------------|
| <a href="#">(130842)</a>     | Date F03 (unspecified dementia) first reported                                                                           | 4. When pairs matching test completed (20134)<br>5. When fluid intelligence test completed (20135)<br>6. When trail making test completed (20136)<br>7. When symbol digit substitution test completed (20137) |
| <a href="#">(130844)</a>     | Date F04 (organic amnesic syndrome, not induced by alcohol and other psychoactive substances) first reported             |                                                                                                                                                                                                               |
| <a href="#">(130846)</a>     | Date F05 (delirium, not induced by alcohol and other psychoactive substances) first reported                             |                                                                                                                                                                                                               |
| <a href="#">(131012)</a>     | Date G10 (Huntington's disease) first reported                                                                           |                                                                                                                                                                                                               |
| <a href="#">(131014)</a>     | Date G11 (hereditary ataxia) first reported                                                                              |                                                                                                                                                                                                               |
| <a href="#">(131016)</a>     | Date G12 (spinal muscular atrophy and related syndromes) first reported                                                  |                                                                                                                                                                                                               |
| <a href="#">(131018)</a>     | Date G13 (systemic atrophies primarily affecting central nervous system in diseases classified elsewhere) first reported |                                                                                                                                                                                                               |
| <a href="#">(131022)</a>     | Date G20 (Parkinson's disease) first reported                                                                            |                                                                                                                                                                                                               |
| <a href="#">(131024)</a>     | Date G21 (secondary parkinsonism) first reported                                                                         |                                                                                                                                                                                                               |
| <a href="#">(131026)</a>     | Date G22 (parkinsonism in diseases classified elsewhere) first reported                                                  |                                                                                                                                                                                                               |
| <a href="#">(131036)</a>     | Date G30 (Alzheimer's disease) first reported                                                                            |                                                                                                                                                                                                               |
| <a href="#">(131038)</a>     | Date G31 (other degenerating diseases of the nervous system, not classified elsewhere) first reported                    |                                                                                                                                                                                                               |
| <a href="#">(131042)</a>     | Date G35 (multiple sclerosis) first reported                                                                             |                                                                                                                                                                                                               |
| <a href="#">(131044)</a>     | Date G36 (other acute disseminated demyelination) first reported                                                         |                                                                                                                                                                                                               |
| <a href="#">(131046)</a>     | Date G37 (other demyelinating diseases of the central nervous system) first reported                                     |                                                                                                                                                                                                               |
| <a href="#">(131212)</a>     | Date H54 (blindness and low vision) first reported                                                                       |                                                                                                                                                                                                               |

## Supplementary File 2

Summary of original and re-classified variables included in final analyses

| UK Biobank code and URL link        | Variable/risk factor                | Description of measure                  | Original levels and/or format | Restructured variable*               | Notes                                                                                                                                                                       |
|-------------------------------------|-------------------------------------|-----------------------------------------|-------------------------------|--------------------------------------|-----------------------------------------------------------------------------------------------------------------------------------------------------------------------------|
| f.eid                               | ID                                  | ID code                                 | <i>Numeric</i>                | <i>Numeric</i>                       |                                                                                                                                                                             |
| f.31.0.0 ( <a href="#">31</a> )     | Sex                                 | Sex                                     | Male                          | Male                                 |                                                                                                                                                                             |
| f.34.0.0 ( <a href="#">34</a> )     |                                     |                                         | Female                        | Female                               |                                                                                                                                                                             |
| f.52.0.0 ( <a href="#">52</a> )     | Age                                 | Year of birth                           | YYYY                          |                                      | All birthdates assumed to be on the 15 <sup>th</sup> day of the month. Age was defined as the years between the approximated birth date, and the date of cognitive testing. |
|                                     |                                     | Month of birth                          | MM                            | Approximate age at cognitive testing |                                                                                                                                                                             |
| f.53.0.0 ( <a href="#">53</a> )     | Date of attending assessment centre | Date of attending assessment centre     | YYYY-MM-DD                    | YYYY-MM-DD                           |                                                                                                                                                                             |
| f.53.1.0 ( <a href="#">53</a> )     |                                     |                                         |                               |                                      |                                                                                                                                                                             |
| f.53.2.0 ( <a href="#">53</a> )     |                                     |                                         |                               |                                      |                                                                                                                                                                             |
| f.53.3.0 ( <a href="#">53</a> )     |                                     |                                         |                               |                                      |                                                                                                                                                                             |
| f.1558.0.0 ( <a href="#">1558</a> ) | Alcohol consumption                 | “About how often do you drink alcohol?” | Daily or almost daily         |                                      |                                                                                                                                                                             |
| f.1558.1.0 ( <a href="#">1558</a> ) |                                     |                                         | Three to four times a week    | “Often/very often”                   |                                                                                                                                                                             |
| f.1558.2.0 ( <a href="#">1558</a> ) |                                     |                                         | Once or twice a week          |                                      |                                                                                                                                                                             |
| f.1558.3.0 ( <a href="#">1558</a> ) |                                     |                                         | One to three times a month    | “Sometimes/never”                    |                                                                                                                                                                             |
|                                     |                                     |                                         | Special occasions only        |                                      |                                                                                                                                                                             |
|                                     |                                     |                                         | Never                         |                                      |                                                                                                                                                                             |

| UK Biobank code and URL link          | Variable/risk factor | Description of measure                                                                                                     | Original levels and/or format | Restructured variable* | Notes                                                                                                 |  |
|---------------------------------------|----------------------|----------------------------------------------------------------------------------------------------------------------------|-------------------------------|------------------------|-------------------------------------------------------------------------------------------------------|--|
|                                       |                      |                                                                                                                            | Prefer not to answer          | “Unknown”              |                                                                                                       |  |
| f.21001.0.0 ( <a href="#">21001</a> ) | Obesity              | BMI value derived from height and weight measured during initial assessment centre visit                                   | Numeric                       | Overweight             | BMI>25                                                                                                |  |
| f.21001.1.0 ( <a href="#">21001</a> ) |                      |                                                                                                                            |                               |                        |                                                                                                       |  |
| f.21001.2.0 ( <a href="#">21001</a> ) |                      |                                                                                                                            |                               | Not overweight         | BMI≤25                                                                                                |  |
| f.21001.3.0 ( <a href="#">21001</a> ) |                      |                                                                                                                            |                               |                        |                                                                                                       |  |
| f.2020.0.0 ( <a href="#">2020</a> )   | Social isolation     | “Do you often feel lonely?”                                                                                                | Yes                           | Yes                    |                                                                                                       |  |
| f.2020.1.0 ( <a href="#">2020</a> )   |                      |                                                                                                                            | No                            | No                     |                                                                                                       |  |
| f.2020.2.0 ( <a href="#">2020</a> )   |                      |                                                                                                                            | Do not know                   | “Unknown”              |                                                                                                       |  |
| f.2020.3.0 ( <a href="#">2020</a> )   |                      |                                                                                                                            | Prefer not to answer          |                        |                                                                                                       |  |
| f.2247.0.0 ( <a href="#">2247</a> )   | Hearing loss         | “Do you have any difficulty with your hearing?”                                                                            | I am completely deaf          | “Yes”                  |                                                                                                       |  |
| f.2247.1.0 ( <a href="#">2247</a> )   |                      |                                                                                                                            | Yes                           |                        |                                                                                                       |  |
| f.2247.2.0 ( <a href="#">2247</a> )   |                      |                                                                                                                            | No                            | No                     |                                                                                                       |  |
| f.2247.3.0 ( <a href="#">2247</a> )   |                      |                                                                                                                            | Do not know                   | “Unknown”              |                                                                                                       |  |
|                                       | Prefer not to answer |                                                                                                                            |                               |                        |                                                                                                       |  |
| f.6150.0.0 ( <a href="#">6150</a> )   | Hypertension         | “Has a doctor ever told you that you have had any of the following conditions?”                                            | Yes                           | Yes                    | Hypertension was one of six possible conditions that could be indicated as ‘yes’, ‘no’, or ‘unknown’. |  |
| f.6150.0.1 ( <a href="#">6150</a> )   |                      |                                                                                                                            | No                            | No                     |                                                                                                       |  |
| f.6150.0.2 ( <a href="#">6150</a> )   |                      |                                                                                                                            | Unknown                       | Unknown                |                                                                                                       |  |
| f.6150.0.3 ( <a href="#">6150</a> )   |                      |                                                                                                                            |                               |                        |                                                                                                       |  |
| f.4596.0.0 ( <a href="#">4598</a> )   | Depression           | “Looking back over your life, have you ever had a time when you were feeling depressed or down for at least a whole week?” | Yes                           | Yes                    |                                                                                                       |  |
|                                       |                      |                                                                                                                            | No                            | No                     |                                                                                                       |  |
|                                       |                      |                                                                                                                            | Do not know                   | “Unknown”              |                                                                                                       |  |
|                                       |                      |                                                                                                                            | Prefer not to answer          |                        |                                                                                                       |  |
| f.2443.0.0 ( <a href="#">2443</a> )   | Diabetes             | “Has a doctor ever told you that you have diabetes?”                                                                       | Yes                           | Yes                    |                                                                                                       |  |
|                                       |                      |                                                                                                                            | No                            | No                     |                                                                                                       |  |
|                                       |                      |                                                                                                                            | Do not know                   | “Unknown”              |                                                                                                       |  |
|                                       |                      |                                                                                                                            | Prefer not to answer          |                        |                                                                                                       |  |

| UK Biobank code and URL link          | Variable/risk factor     | Description of measure                                                                                          | Original levels and/or format                             | Restructured variable*                                                                                                               | Notes                                                                                                                                                                                                               |
|---------------------------------------|--------------------------|-----------------------------------------------------------------------------------------------------------------|-----------------------------------------------------------|--------------------------------------------------------------------------------------------------------------------------------------|---------------------------------------------------------------------------------------------------------------------------------------------------------------------------------------------------------------------|
| f.6138.0.0 ( <a href="#">6138</a> )   | Education/qualifications | “Which of the following qualifications do you have? (You can select more than one)”                             | A levels/ AS levels or equivalent                         | “High school”                                                                                                                        | Restructured variable “ <i>highest qualification</i> ” ranked the reported qualifications (across all available assessment centre datapoints) from highest to lowest, resulting in only one category per ID number. |
| f.6138.0.1 ( <a href="#">6138</a> )   |                          |                                                                                                                 | O levels/ GCSEs or equivalent                             |                                                                                                                                      |                                                                                                                                                                                                                     |
| f.6138.0.2 ( <a href="#">6138</a> )   |                          |                                                                                                                 | CSEs or equivalent                                        |                                                                                                                                      |                                                                                                                                                                                                                     |
| f.6138.0.3 ( <a href="#">6138</a> )   |                          |                                                                                                                 | NVQ or HND or HNC or equivalent                           | “Certificate III/Diploma”                                                                                                            |                                                                                                                                                                                                                     |
| f.6138.0.4 ( <a href="#">6138</a> )   |                          |                                                                                                                 | Other professional qualifications e.g., nursing, teaching |                                                                                                                                      |                                                                                                                                                                                                                     |
| f.6138.0.5 ( <a href="#">6138</a> )   |                          |                                                                                                                 | College or university degree                              | “College/University”                                                                                                                 |                                                                                                                                                                                                                     |
| f.6138.1.0 ( <a href="#">6138</a> )   |                          |                                                                                                                 | None of the above                                         |                                                                                                                                      |                                                                                                                                                                                                                     |
| f.6138.1.1 ( <a href="#">6138</a> )   |                          |                                                                                                                 | Prefer not to answer                                      | “Unknown”                                                                                                                            |                                                                                                                                                                                                                     |
| f.6138.1.2 ( <a href="#">6138</a> )   |                          |                                                                                                                 |                                                           |                                                                                                                                      |                                                                                                                                                                                                                     |
| f.6138.1.3 ( <a href="#">6138</a> )   |                          |                                                                                                                 |                                                           |                                                                                                                                      |                                                                                                                                                                                                                     |
| f.6138.1.4 ( <a href="#">6138</a> )   |                          |                                                                                                                 |                                                           |                                                                                                                                      |                                                                                                                                                                                                                     |
| f.6138.1.5 ( <a href="#">6138</a> )   |                          |                                                                                                                 |                                                           |                                                                                                                                      |                                                                                                                                                                                                                     |
| f.6138.2.0 ( <a href="#">6138</a> )   |                          |                                                                                                                 |                                                           |                                                                                                                                      |                                                                                                                                                                                                                     |
| f.6138.2.1 ( <a href="#">6138</a> )   |                          |                                                                                                                 |                                                           |                                                                                                                                      |                                                                                                                                                                                                                     |
| f.6138.2.2 ( <a href="#">6138</a> )   |                          |                                                                                                                 |                                                           |                                                                                                                                      |                                                                                                                                                                                                                     |
| f.6138.2.3 ( <a href="#">6138</a> )   |                          |                                                                                                                 |                                                           |                                                                                                                                      |                                                                                                                                                                                                                     |
| f.6138.2.4 ( <a href="#">6138</a> )   |                          |                                                                                                                 |                                                           |                                                                                                                                      |                                                                                                                                                                                                                     |
| f.6138.2.5 ( <a href="#">6138</a> )   |                          |                                                                                                                 |                                                           |                                                                                                                                      |                                                                                                                                                                                                                     |
| f.6138.3.0 ( <a href="#">6138</a> )   |                          |                                                                                                                 |                                                           | Original education levels were mapped to Australian equivalents, as the final Shiny application was used by Australian participants. |                                                                                                                                                                                                                     |
| f.6138.3.1 ( <a href="#">6138</a> )   |                          |                                                                                                                 |                                                           |                                                                                                                                      |                                                                                                                                                                                                                     |
| f.6138.3.2 ( <a href="#">6138</a> )   |                          |                                                                                                                 |                                                           |                                                                                                                                      |                                                                                                                                                                                                                     |
| f.6138.3.3 ( <a href="#">6138</a> )   |                          |                                                                                                                 |                                                           |                                                                                                                                      |                                                                                                                                                                                                                     |
| f.6138.3.4 ( <a href="#">6138</a> )   |                          |                                                                                                                 |                                                           |                                                                                                                                      |                                                                                                                                                                                                                     |
| f.6138.3.5 ( <a href="#">6138</a> )   |                          |                                                                                                                 |                                                           |                                                                                                                                      |                                                                                                                                                                                                                     |
| f.20116.0.0 ( <a href="#">20116</a> ) | Smoking status           | Combination of two questions: “Do you smoke tobacco now?” and “In the past, how often have you smoked tobacco?” | Current                                                   | Current                                                                                                                              |                                                                                                                                                                                                                     |
| f.20116.1.0 ( <a href="#">20116</a> ) |                          |                                                                                                                 | Previous                                                  | Previous                                                                                                                             |                                                                                                                                                                                                                     |
| f.20116.2.0 ( <a href="#">20116</a> ) |                          |                                                                                                                 | Never                                                     | Never                                                                                                                                |                                                                                                                                                                                                                     |
| f.20116.3.0 ( <a href="#">20116</a> ) |                          |                                                                                                                 | Prefer not to answer                                      | “Unknown”                                                                                                                            |                                                                                                                                                                                                                     |
| f.21000.0.0 ( <a href="#">21000</a> ) | Ethnic background        | “What is your ethnic group?”                                                                                    | White<br>Mixed                                            | White<br>Non-White                                                                                                                   | The top-level response for this                                                                                                                                                                                     |

| UK Biobank code and URL link          | Variable/risk factor | Description of measure                                                   | Original levels and/or format                                                                                                               | Restructured variable*                      | Notes                                                                                                                                                                                                                                                                |
|---------------------------------------|----------------------|--------------------------------------------------------------------------|---------------------------------------------------------------------------------------------------------------------------------------------|---------------------------------------------|----------------------------------------------------------------------------------------------------------------------------------------------------------------------------------------------------------------------------------------------------------------------|
|                                       |                      |                                                                          | <div>Asian or Asian British</div> <div>Black or Black British</div> <div>Chinese</div> <div>Other ethnic group</div> <div>Do not know</div> |                                             | <div>variable was used to classify ethnic background.</div> <div>Due to extreme skewness in ethnicity variable, the default level 'White' was used in all modelling. The question was not asked in the final app due to misalignment with Australian contexts.</div> |
| f.20132.0.0 ( <a href="#">20132</a> ) | Memory               | Pairs Matching: number of incorrect matches in round                     | Numeric                                                                                                                                     | Numeric (age- and sex-standardised z-score) |                                                                                                                                                                                                                                                                      |
| f.20240.0.0 ( <a href="#">20240</a> ) |                      | Numeric Memory: maximum digits remembered correctly                      | Numeric                                                                                                                                     |                                             |                                                                                                                                                                                                                                                                      |
| f.20156.0.0 ( <a href="#">20156</a> ) | Processing Speed     | Trail Making: duration to complete Trails A (numeric path)               | Numeric                                                                                                                                     | Numeric (age- and sex-standardised z-score) |                                                                                                                                                                                                                                                                      |
| f.20159.0.0 ( <a href="#">20159</a> ) |                      | Symbol Digit Substitution: number of symbol digit matches made correctly | Numeric                                                                                                                                     |                                             |                                                                                                                                                                                                                                                                      |
| f.20157.0.0 ( <a href="#">20157</a> ) | Executive Function   | Trail Making: duration to complete Trails B (alphanumeric path)          | Numeric                                                                                                                                     | Numeric                                     |                                                                                                                                                                                                                                                                      |

| UK Biobank code and URL link          | Variable/risk factor             | Description of measure                                                              | Original levels and/or format | Restructured variable* | Notes |
|---------------------------------------|----------------------------------|-------------------------------------------------------------------------------------|-------------------------------|------------------------|-------|
| f.20191.0.0 ( <a href="#">20191</a> ) | Reasoning                        | Fluid Intelligence: fluid intelligence score global                                 | <i>Numeric</i>                | <i>Numeric</i>         |       |
| -                                     | Global cognitive function        | *mean of Memory, Processing Speed, Executive Function and Reasoning z-scores/scores | <i>Numeric</i>                | <i>Numeric</i>         |       |
| f.90010.0.0 ( <a href="#">90010</a> ) | Start time of accelerometer wear | Start time of accelerometer wear                                                    |                               |                        |       |

*Note.* The original UK biobank variables, their levels and format, compared to the restructured variable. Where necessary, variables were re-structured to align with Australian classifications. BMI=body mass index.



### Supplementary File 3

Lambda value derived from 10-fold cross-validation

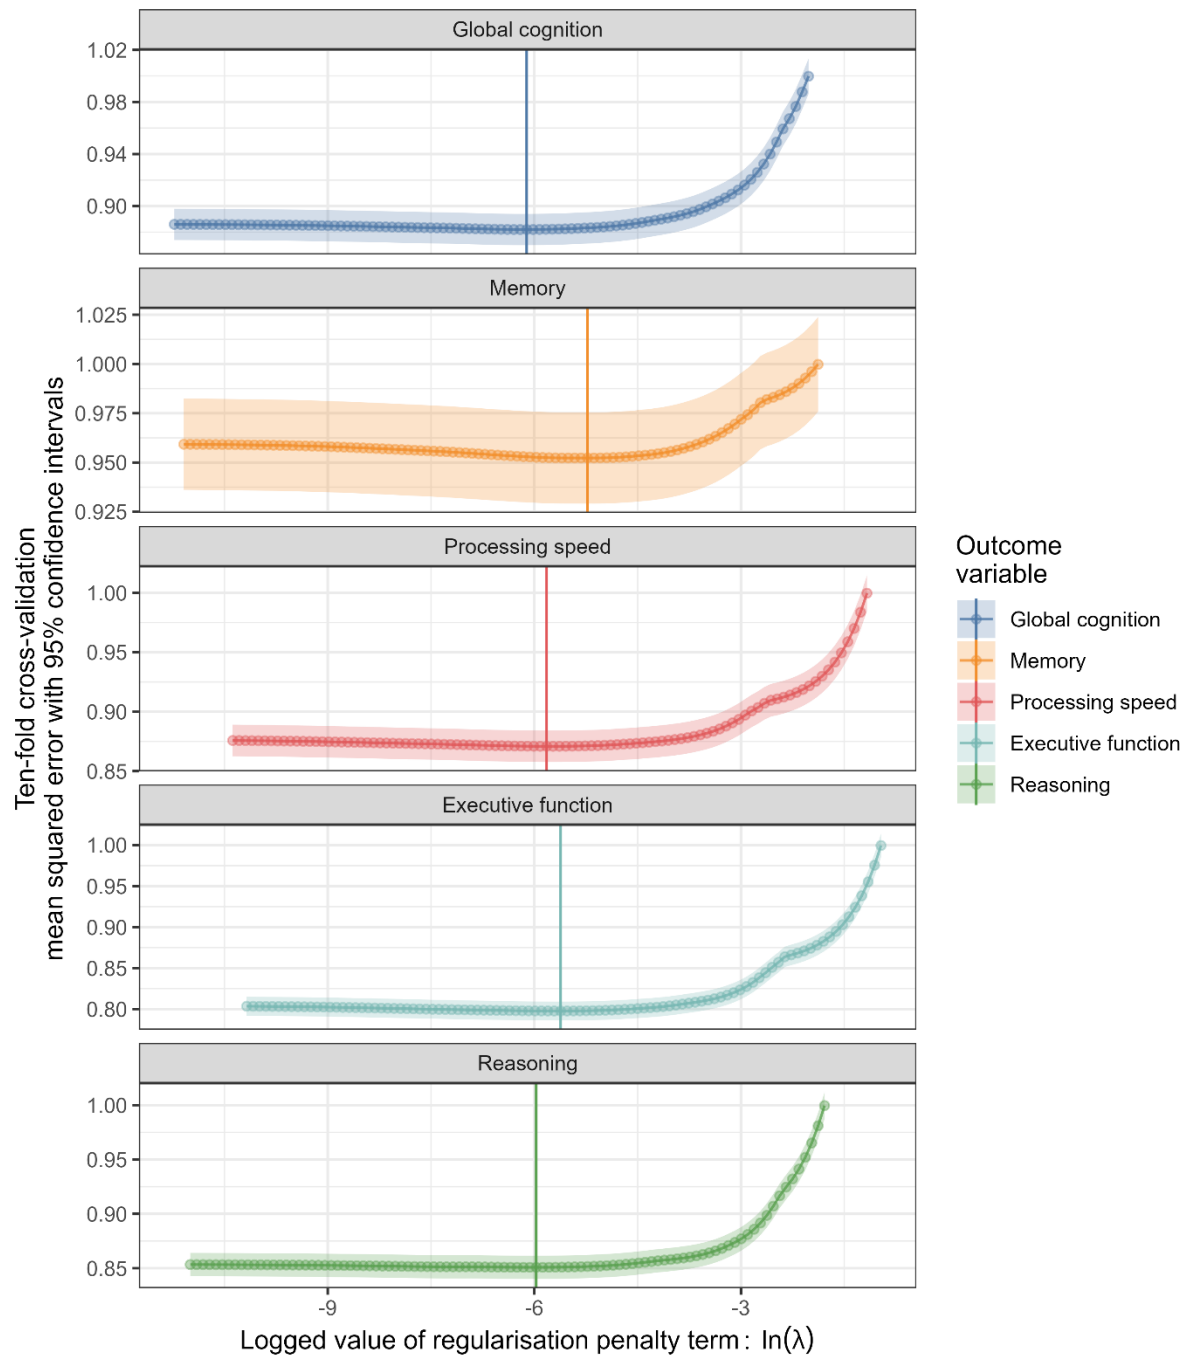

*Note.* Empirically derived penalty values applied to the group LASSO shrinkage procedure for each cognitive outcome (listed in header). The logged value of the regularisation penalty term ( $\ln(\lambda)$ ) is displayed (x-axis, with lambda value indicated by vertical coloured line) against the mean squared error (MSE, y-axis).

## Supplementary File 4

Workflow underpinning the R Shiny 'ideal day' app.

### Model building

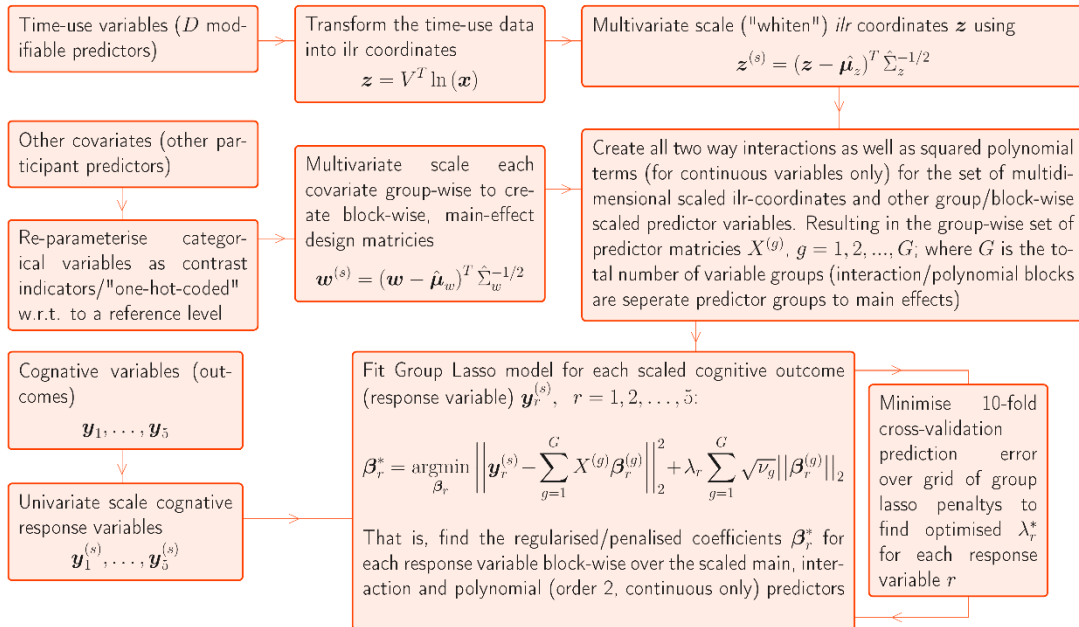

### User side

### Personalised optimisation

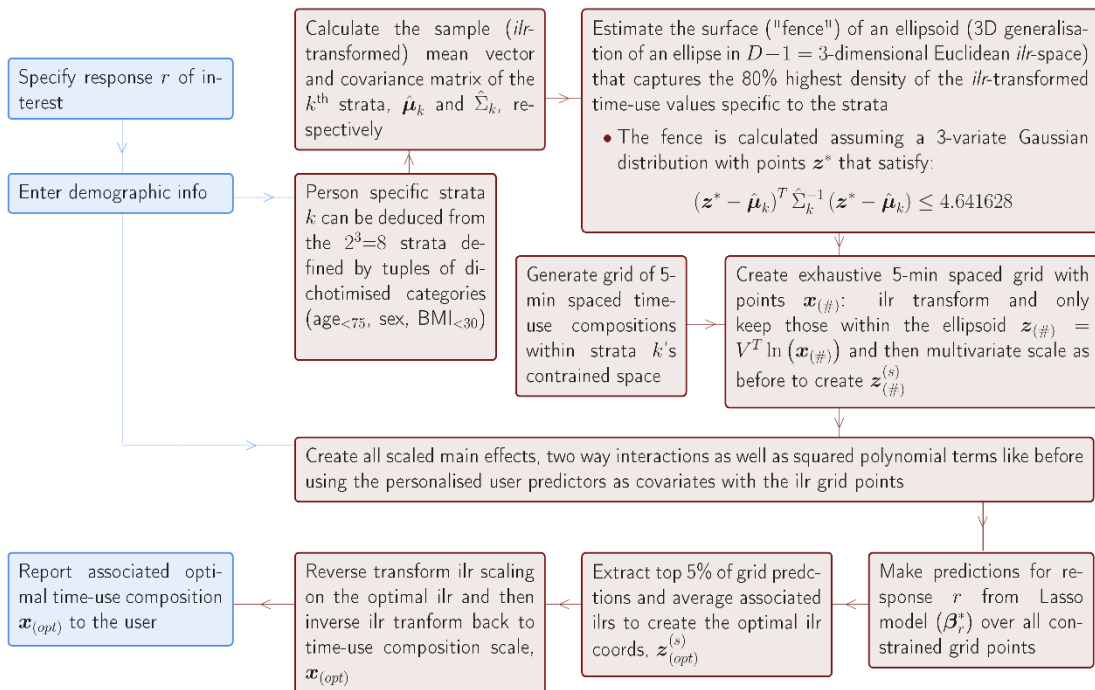

## Supplementary File 5

Demographic characteristics across strata

| Characteristic             | Level       | Overall sample | Strata classification     |                         |                           |                         |                         |                       |                         |                       |
|----------------------------|-------------|----------------|---------------------------|-------------------------|---------------------------|-------------------------|-------------------------|-----------------------|-------------------------|-----------------------|
|                            |             |                | Females, <65, wo/ obesity | Females, <65, w/obesity | Females, ≥65, wo/ obesity | Females, ≥65, w/obesity | Males, <65, wo/ obesity | Males, <65, w/obesity | Males, ≥65, wo/ obesity | Males, ≥65, w/obesity |
| <i>N</i>                   |             | 53,057         | 15,303                    | 3,259                   | 9,465                     | 2,064                   | 9,610                   | 2,451                 | 8,809                   | 2,096                 |
| Age (years)                |             | 62 (8)         | 57 (5)                    | 57 (5)                  | 69 (3)                    | 69 (3)                  | 57 (5)                  | 57 (5)                | 70 (3)                  | 70 (3)                |
| Sex (%)                    | Female      | 30,091 (57%)   | 15,303 (100%)             | 3,259 (100%)            | 9,465 (100%)              | 2,064 (100%)            | -                       | -                     | -                       | -                     |
|                            | Male        | 22,966 (43%)   | -                         | -                       | -                         | -                       | 9,610 (100%)            | 2,451 (100%)          | 8,809 (100%)            | 2,096 (100%)          |
| 24-hr time-use composition | Sleep       | 542.7          | 542.3                     | 542.2                   | 543.8                     | 542.3                   | 533.4                   | 528.7                 | 546.6                   | 551.2                 |
|                            | SB          | 576.9          | 549.4                     | 595.7                   | 549.4                     | 603.1                   | 595.5                   | 632.2                 | 588.0                   | 630.8                 |
|                            | LPA         | 291.2          | 318.1                     | 287.0                   | 322.6                     | 283.0                   | 267.3                   | 251.8                 | 267.9                   | 237.8                 |
|                            | MVPA        | 29.2           | 30.1                      | 15.0                    | 24.3                      | 11.6                    | 43.7                    | 27.3                  | 37.4                    | 20.2                  |
| BMI                        |             | 26.6 (4.5)     | 24.2 (2.8)                | 34.5 (4.1)              | 24.7 (2.7)                | 33.8 (3.7)              | 25.5 (2.5)              | 33.4 (3.4)            | 25.8 (2.4)              | 33.0 (3.0)            |
| Highest qualification      | High school | 10,637 (20%)   | 3,234 (21%)               | 799 (25%)               | 2,332 (25%)               | 532 (26%)               | 1,552 (16%)             | 472 (19%)             | 1,336 (15%)             | 380 (18%)             |

| Characteristic | Level                            | Overall sample | Strata classification     |                         |                           |                         |                         |                       |                         |                       |
|----------------|----------------------------------|----------------|---------------------------|-------------------------|---------------------------|-------------------------|-------------------------|-----------------------|-------------------------|-----------------------|
|                |                                  |                | Females, <65, wo/ obesity | Females, <65, w/obesity | Females, ≥65, wo/ obesity | Females, ≥65, w/obesity | Males, <65, wo/ obesity | Males, <65, w/obesity | Males, ≥65, wo/ obesity | Males, ≥65, w/obesity |
|                | Certificate III or Diploma       | 5,805 (11%)    | 1,499 (9.8%)              | 424 (13%)               | 549 (5.8%)                | 176 (8.5%)              | 1,298 (14%)             | 404 (16%)             | 1,138 (13%)             | 317 (15%)             |
|                | College/University               | 24,742 (47%)   | 7,918 (52%)               | 1,336 (41%)             | 3,820 (40%)               | 638 (31%)               | 5,232 (54%)             | 1,012 (41%)           | 4,081 (46%)             | 705 (34%)             |
|                | Other professional qualification | 8,092 (15%)    | 2,148 (14%)               | 520 (16%)               | 1,712 (18%)               | 401 (19%)               | 1,208 (13%)             | 420 (17%)             | 1,317 (15%)             | 366 (17%)             |
|                | <i>Unknown</i>                   | 3,781 (7.1%)   | 504 (3.3%)                | 180 (5.5%)              | 1,052 (11%)               | 317 (15%)               | 320 (3.3%)              | 143 (5.8%)            | 937 (11%)               | 328 (16%)             |
| Depression     | Yes                              | 10,734 (20%)   | 3,470 (23%)               | 840 (26%)               | 1,977 (21%)               | 465 (23%)               | 1,658 (17%)             | 511 (21%)             | 1,422 (16%)             | 391 (19%)             |
|                | No                               | 9,141 (17%)    | 2,302 (15%)               | 400 (12%)               | 1,544 (16%)               | 338 (16%)               | 1,863 (19%)             | 443 (18%)             | 1,798 (20%)             | 453 (22%)             |
|                | <i>Unknown</i>                   | 33,182 (63%)   | 9,531 (62%)               | 2,019 (62%)             | 5,944 (63%)               | 1,261 (61%)             | 6,089 (63%)             | 1,497 (61%)           | 5,589 (63%)             | 1,252 (60%)           |
| Diabetes       | Yes                              | 1,665 (3.2%)   | 157 (1.0%)                | 181 (5.6%)              | 160 (1.7%)                | 143 (6.9%)              | 166 (1.7%)              | 207 (8.4%)            | 357 (4.1%)              | 294 (14%)             |
|                | No                               | 51,295 (97%)   | 15,120 (99%)              | 3,071 (94%)             | 9,290 (98%)               | 1,915 (93%)             | 9,429 (98%)             | 2,233 (91%)           | 8,438 (96%)             | 1,799 (86%)           |
|                | <i>Unknown</i>                   | 97 (0.2%)      | 26 (0.2%)                 | 7 (0.2%)                | 15 (0.2%)                 | 6 (0.3%)                | 15 (0.2%)               | 11 (0.4%)             | 14 (0.2%)               | 3 (0.1%)              |

|                    |                |                | Strata classification     |                         |                           |                         |                         |                       |                         |                       |
|--------------------|----------------|----------------|---------------------------|-------------------------|---------------------------|-------------------------|-------------------------|-----------------------|-------------------------|-----------------------|
| Characteristic     | Level          | Overall sample | Females, <65, wo/ obesity | Females, <65, w/obesity | Females, ≥65, wo/ obesity | Females, ≥65, w/obesity | Males, <65, wo/ obesity | Males, <65, w/obesity | Males, ≥65, wo/ obesity | Males, ≥65, w/obesity |
| Hearing difficulty | Yes            | 12,713 (24%)   | 2,492 (16%)               | 667 (20%)               | 2,287 (24%)               | 557 (27%)               | 2,157 (22%)             | 641 (26%)             | 3,143 (36%)             | 769 (37%)             |
|                    | No             | 38,221 (72%)   | 12,138 (79%)              | 2,401 (74%)             | 6,744 (71%)               | 1,412 (68%)             | 7,152 (74%)             | 1,731 (71%)           | 5,379 (61%)             | 1,264 (60%)           |
|                    | <i>Unknown</i> | 2,123 (4.0%)   | 673 (4.4%)                | 191 (5.9%)              | 434 (4.6%)                | 95 (4.6%)               | 301 (3.1%)              | 79 (3.2%)             | 287 (3.3%)              | 63 (3.0%)             |
| Hypertension       | Yes            | 12,595 (24%)   | 1,723 (11%)               | 949 (29%)               | 2,319 (25%)               | 924 (45%)               | 1,558 (16%)             | 948 (39%)             | 2,963 (34%)             | 1,211 (58%)           |
|                    | No             | 40,390 (76%)   | 13,561 (89%)              | 2,304 (71%)             | 7,130 (75%)               | 1,135 (55%)             | 8,040 (84%)             | 1,501 (61%)           | 5,836 (66%)             | 883 (42%)             |
|                    | <i>Unknown</i> | 72 (0.1%)      | 19 (0.1%)                 | 6 (0.2%)                | 16 (0.2%)                 | 5 (0.2%)                | 12 (0.1%)               | 2 (<0.1%)             | 10 (0.1%)               | 2 (<0.1%)             |
| Social isolation   | Yes            | 7,851 (15%)    | 2,592 (17%)               | 777 (24%)               | 1,373 (15%)               | 376 (18%)               | 1,283 (13%)             | 447 (18%)             | 750 (8.5%)              | 253 (12%)             |
|                    | No             | 44,584 (84%)   | 12,506 (82%)              | 2,443 (75%)             | 7,981 (84%)               | 1,661 (80%)             | 8,201 (85%)             | 1,983 (81%)           | 7,979 (91%)             | 1,830 (87%)           |
|                    | <i>Unknown</i> | 622 (1.2%)     | 205 (1.3%)                | 39 (1.2%)               | 111 (1.2%)                | 27 (1.3%)               | 126 (1.3%)              | 21 (0.9%)             | 80 (0.9%)               | 13 (0.6%)             |
| Smoking status     | Current        | 3,447 (6.5%)   | 1,000 (6.5%)              | 220 (6.8%)              | 366 (3.9%)                | 88 (4.3%)               | 851 (8.9%)              | 222 (9.1%)            | 562 (6.4%)              | 138 (6.6%)            |

| Characteristic                                   | Level            | Overall sample | Strata classification     |                         |                           |                         |                         |                       |                         |                       |
|--------------------------------------------------|------------------|----------------|---------------------------|-------------------------|---------------------------|-------------------------|-------------------------|-----------------------|-------------------------|-----------------------|
|                                                  |                  |                | Females, <65, wo/ obesity | Females, <65, w/obesity | Females, ≥65, wo/ obesity | Females, ≥65, w/obesity | Males, <65, wo/ obesity | Males, <65, w/obesity | Males, ≥65, wo/ obesity | Males, ≥65, w/obesity |
|                                                  | Previous         | 18,960 (36%)   | 4,529 (30%)               | 1,090 (33%)             | 3,483 (37%)               | 845 (41%)               | 2,906 (30%)             | 968 (39%)             | 3,915 (44%)             | 1,224 (58%)           |
|                                                  | Never            | 30,532 (58%)   | 9,743 (64%)               | 1,944 (60%)             | 5,589 (59%)               | 1,127 (55%)             | 5,837 (61%)             | 1,256 (51%)           | 4,312 (49%)             | 724 (35%)             |
|                                                  | <i>Unknown</i>   | 118 (0.2%)     | 31 (0.2%)                 | 5 (0.2%)                | 27 (0.3%)                 | 4 (0.2%)                | 16 (0.2%)               | 5 (0.2%)              | 20 (0.2%)               | 10 (0.5%)             |
| Alcohol consumption (frequency)                  | Often/very often | 12,415 (23%)   | 2,750 (18%)               | 337 (10%)               | 2,402 (25%)               | 314 (15%)               | 2,395 (25%)             | 519 (21%)             | 3,042 (35%)             | 656 (31%)             |
|                                                  | Sometimes/never  | 26,641 (50%)   | 8,474 (55%)               | 2,298 (71%)             | 4,818 (51%)               | 1,393 (67%)             | 4,282 (45%)             | 1,281 (52%)           | 3,231 (37%)             | 864 (41%)             |
|                                                  | <i>Unknown</i>   | 14,001 (26%)   | 4,079 (27%)               | 624 (19%)               | 2,245 (24%)               | 357 (17%)               | 2,933 (31%)             | 651 (27%)             | 2,536 (29%)             | 576 (27%)             |
| History of traumatic brain injury                |                  | 106 (0.2%)     | 24 (0.2%)                 | 3 (<0.1%)               | 16 (0.2%)                 | 3 (0.1%)                | 29 (0.3%)               | 5 (0.2%)              | 20 (0.2%)               | 6 (0.3%)              |
| Ethnicity                                        | White            | 51,577 (97%)   | 14,765 (96%)              | 3,123 (96%)             | 9,320 (98%)               | 2,024 (98%)             | 9,276 (97%)             | 2,357 (96%)           | 8,658 (98%)             | 2,054 (98%)           |
|                                                  | Non-white        | 1,480 (2.8%)   | 538 (3.5%)                | 136 (4.2%)              | 145 (1.5%)                | 40 (1.9%)               | 334 (3.5%)              | 94 (3.8%)             | 151 (1.7%)              | 42 (2.0%)             |
| Days between accelerometry and cognitive testing |                  | 52 (232)       | 55 (234)                  | 53 (233)                | 52 (232)                  | 49 (226)                | 54 (232)                | 47 (228)              | 50 (231)                | 49 (235)              |

*Note.* Mean and standard deviation (SD) are presented for continuous variables, and count and proportion (n(%)) are presented for categorical variables for the overall sample and within strata. BMI=body mass index; SB=sedentary behaviour; LPA=light intensity physical activity; MVPA=moderate-to-vigorous intensity physical activity. A positive value for days between accelerometry and cognitive testing indicates that accelerometry measures occurred later than cognitive testing.

## Supplementary File 6

### Feasible limits of time-use behaviours within strata

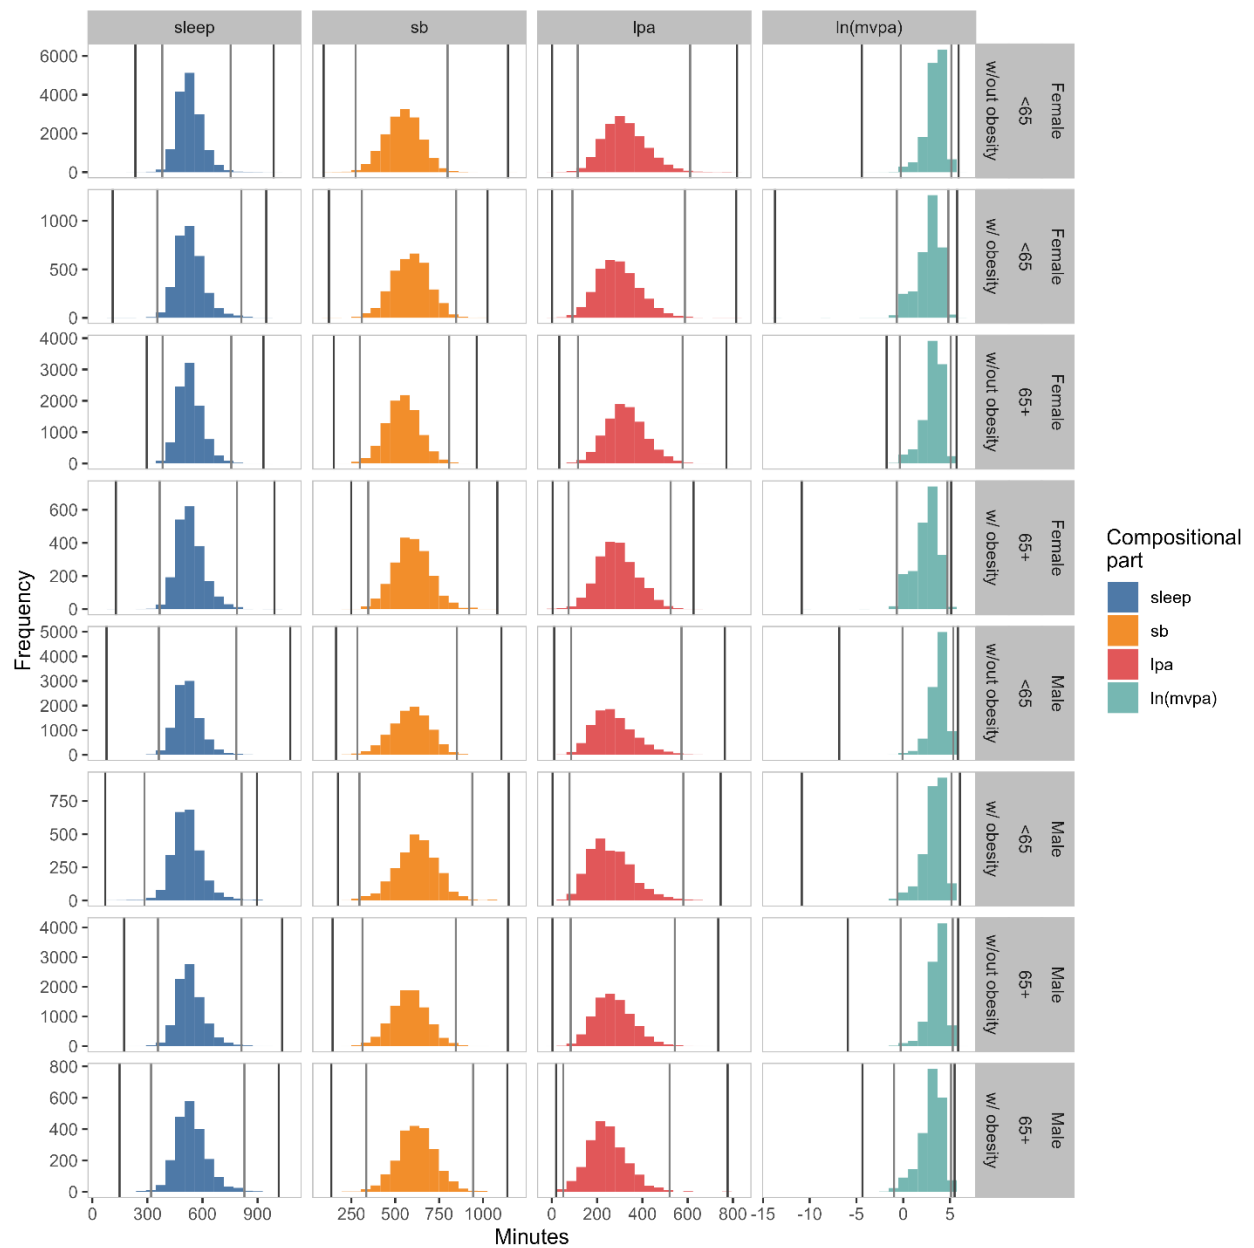

*Note.* Histograms representing distribution of time-use behaviours (header) within each strata (listed on far right). Darker vertical lines within each facet represent the minimum and maximum values of the distribution. Grey vertical lines represent the truncating 0.5% percentile values at the distribution extremes (regarding ellipsoid fencing).
